CORRECTION

# Correction: Investigating the Goldilocks Hypothesis: The Non-Linear Impact of Positive Trait Change on Well-Being

Chris C. Martin, Corey L. M. Keyes

There is an error in the fifth sentence of the second paragraph under the sub-subheading Subjective Well-Being, within the subheading Measures in the Methods section. This sentence should read as follows:

Life satisfaction was measured with a five-item scale in which participants rated their life overall, work situation, health, relationship with spouse (or partner), and relationship with children on a scale from 0 (worst possible) to 10 (best possible) [84]. The internal consistency of this scale was .67 in MIDUS I and .64 in MIDUS II (University of Wisconsin Institute on Aging, 2010 and 2009).

The references are: University of Wisconsin Institute on Aging. Documentation of Psychosocial Constructs and Composite Variables in MIDUS II Project 1. Ann Arbor, Michigan: Inter-University Consortium for Political and Social Research; 2010. Report No.: ICPSR 4652.

University of Wisconsin Institute on Aging. Documentation of Scales and Constructed Variables in MIDUS. Ann Arbor, Michigan: Inter-University Consortium for Political and Social Research; 2009. Report No.: ICPSR 2760.

## Reference

1. Martin CC, Keyes CLM (2015) Investigating the Goldilocks Hypothesis: The Non-Linear Impact of Positive Trait Change on Well-Being. PLoS ONE 10(7): e0131316. doi: [10.1371/journal.pone.0131316](https://doi.org/10.1371/journal.pone.0131316) PMID: [26161648](https://pubmed.ncbi.nlm.nih.gov/26161648/)

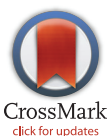

click for updates

## OPEN ACCESS

**Citation:** Martin CC, Keyes CLM (2015) Correction: Investigating the Goldilocks Hypothesis: The Non-Linear Impact of Positive Trait Change on Well-Being. PLoS ONE 10(9): e0139760. doi:10.1371/journal.pone.0139760

**Published:** September 29, 2015

**Copyright:** © 2015 Martin, Keyes. This is an open access article distributed under the terms of the [Creative Commons Attribution License](https://creativecommons.org/licenses/by/4.0/), which permits unrestricted use, distribution, and reproduction in any medium, provided the original author and source are credited.
